# Supplementary material
Source: PubMed Central journal article supplement (PMC7744365)
Supplement: NIHMS1640621-supplement-Supp_Materials.pdf [file NIHMS1640621-supplement-Supp_Materials.pdf]

# Supplementary Figures, Legends to Supplementary Figures and Supplementary Tables

## Supplementary Figure-1

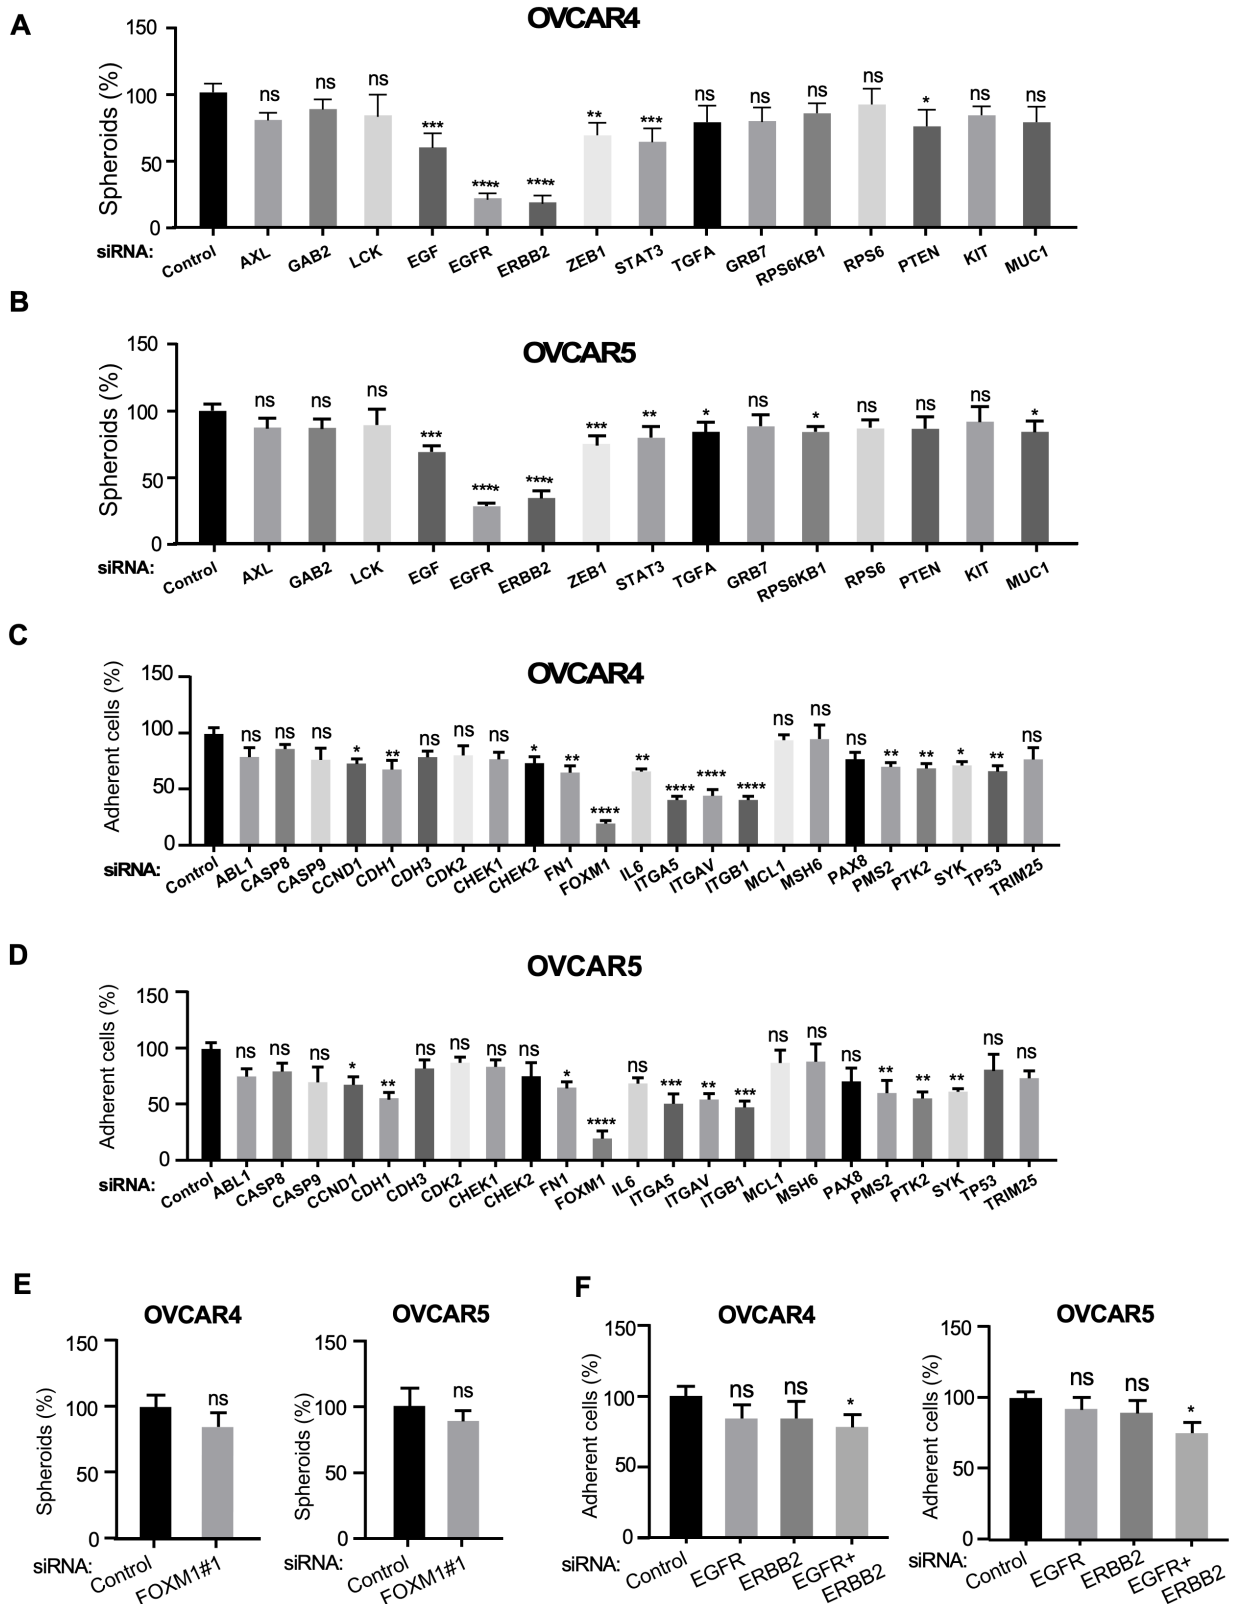

**Supplementary Figure-1: A-B:** OVCAR4 and OVCAR5 cells were transfected with control siRNA or siRNAs of all genes indicated NAD network in Fig-2C, then trypsinized 12h after transfection and cells seeded on non-adherent culture plate for 6 days and number of spheroids formed were quantitated. **C-D:** OVCAR4 and OVCAR5 cells were transfected with control siRNA or siRNAs of all genes indicated in the AD gene network in Fig. 2D. Cells were trypsinized 18h after transfection and 1000 cells from each group were plated on ~90% confluent mesothelial cells in three biological replicates in 96-well culture plate for 3h at 37°C. Non-adherent cells were washed and removed and the fluorescent signaling intensity was determined by fluorimetry. **E.** FOXM1 was knocked down using target-specific siRNA in OVCAR4 and OVCAR5 cells and then plated for spheroid formation as described in A. **F.** EGFR, and ERBB2 were knocked individually or in combination using siRNAs and the cells were plated as in C and cell adhesion was determined.

## Supplementary Figure-2

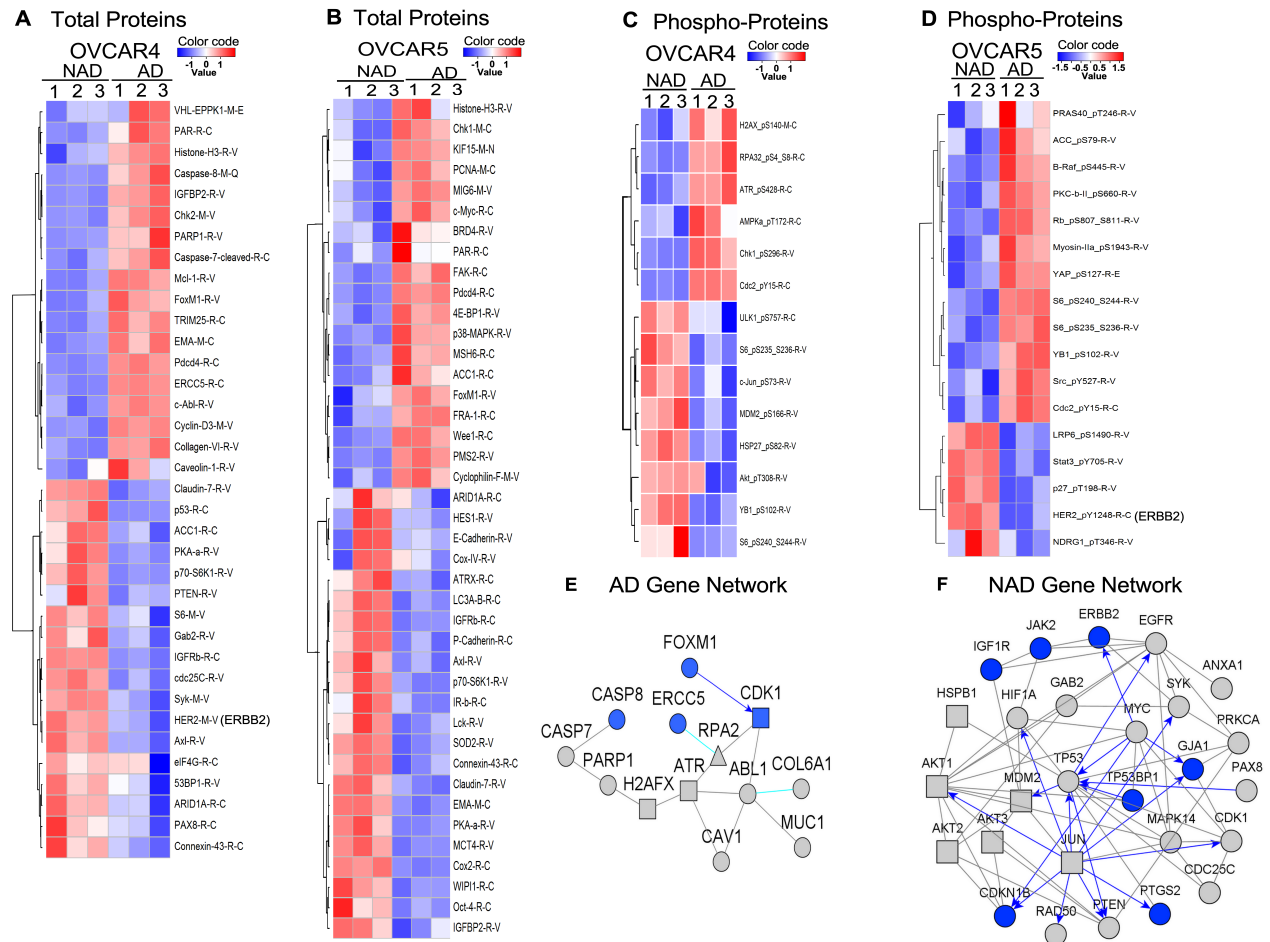

### Supplementary Figure-2:

**A-B**, Adherent (AD) or non-adherent (NAD) cells of both OVCAR4 and OVCAR5 cell were grown on AD or NAD conditions for 24h. Tumor cell lysates were prepared and RPPA analysis was performed. Heat maps in A represents the total proteins altered with a log fold change  $\geq 0.2$  between AD versus NAD conditions. **C-D**, Heat maps represents the phospho-proteins altered with a log fold change  $\geq 0.15$  between AD versus NAD cells in triplicates. **E-F**, Protein network shows the connectivity between genes altered in AD or

NAD form of cells plotted using Netwalker. Circle indicate total protein; whereas the square indicates phospho proteins respectively. Triangle indicates the candidates are altered in both total and phospho form. Blue color nodes are altered in both cell lines. Grey shows the proteins altered in one cell line or the proteins identified for connectivity by Netwalker.

### Supplementary Figure-3

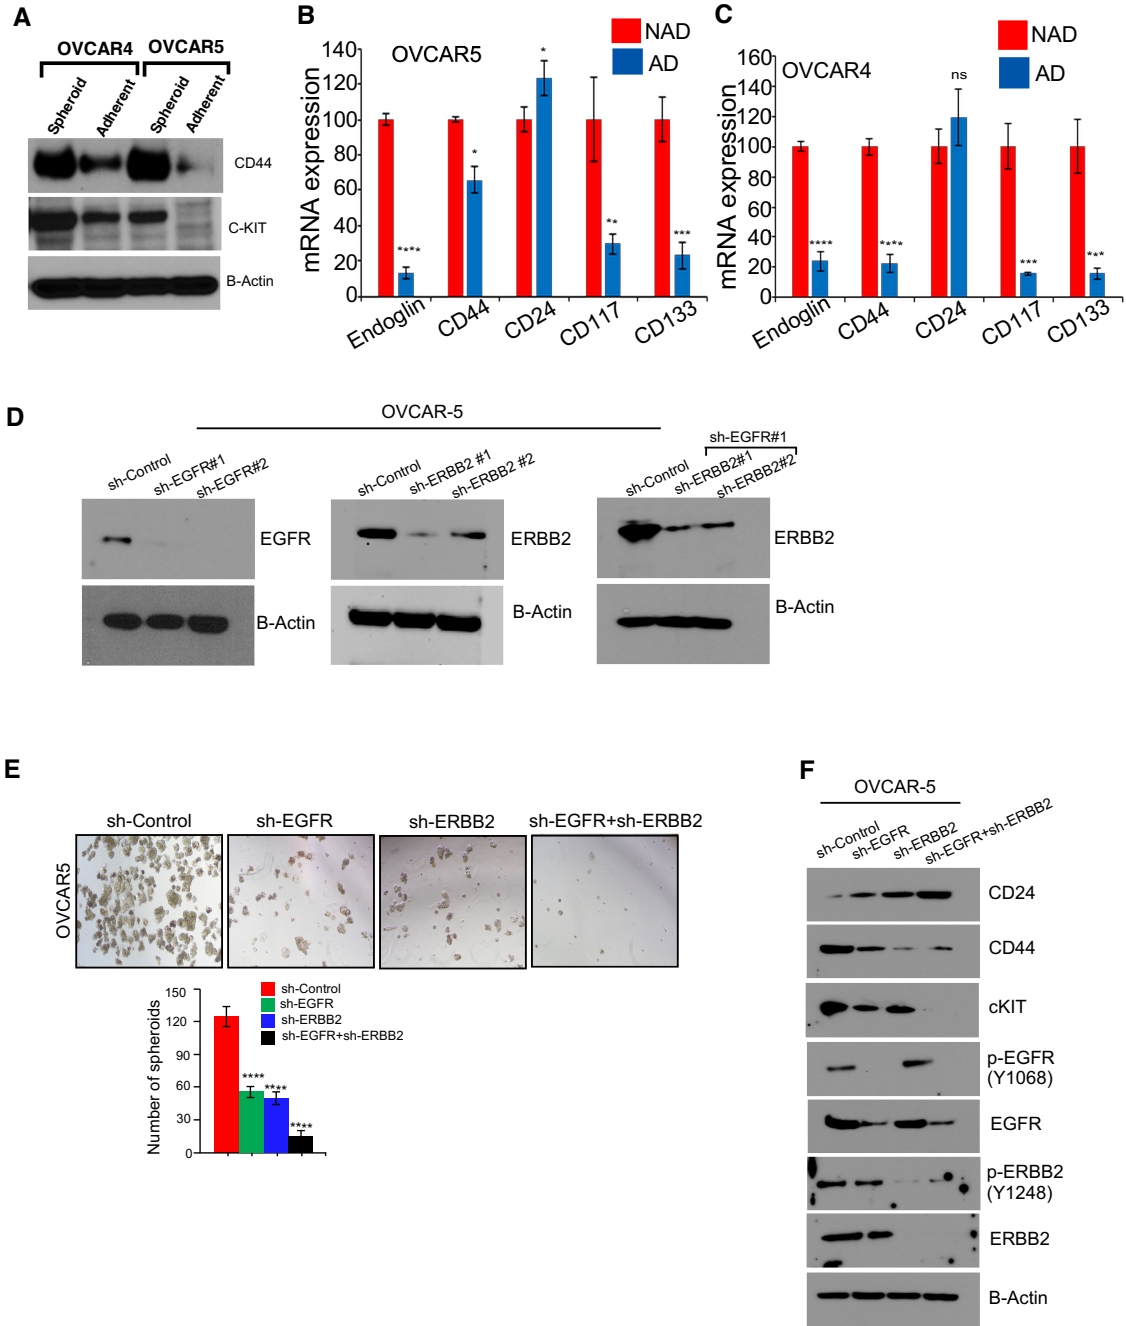

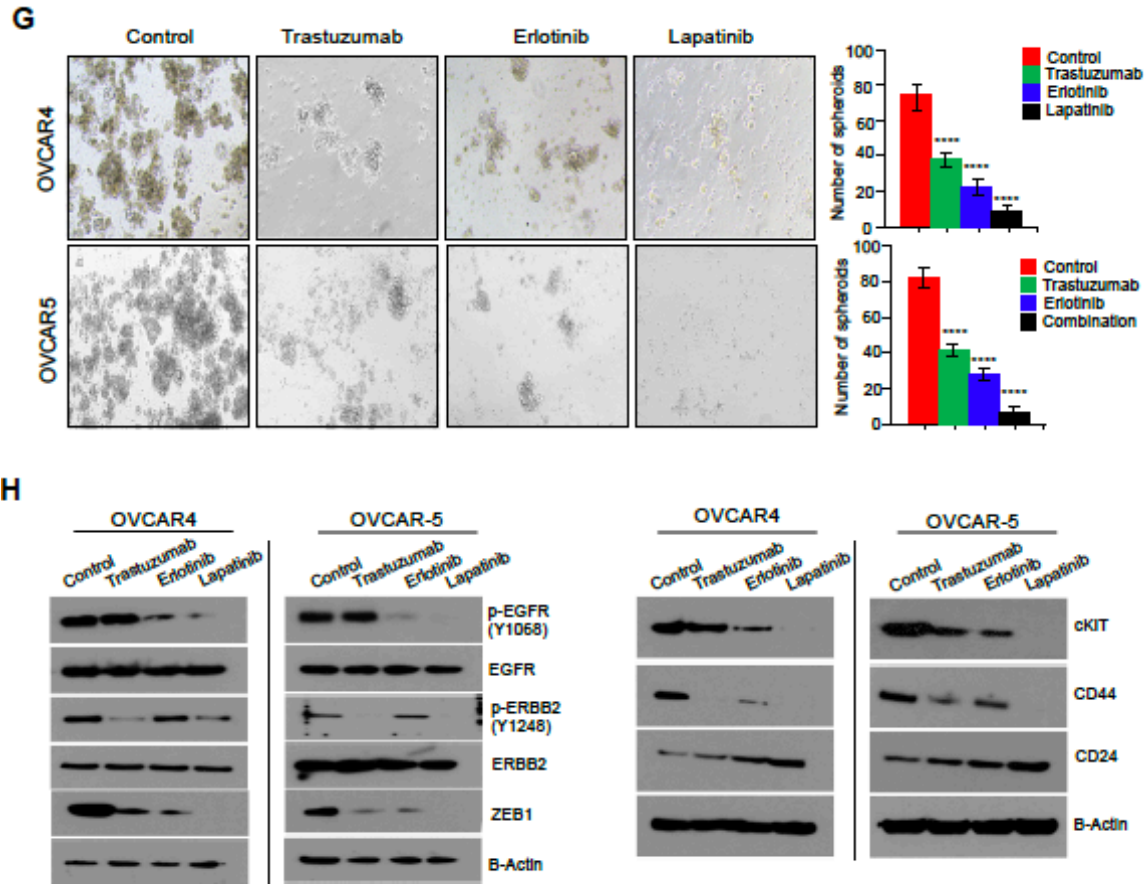

**Supplementary Figure-3: A**, Ovarian cancer cell lines OVCAR4 and OVCAR5 were cultured on adherent or non-adherent culture plate for 24h; then cell lysates were prepared and immunoblot was performed using antibodies indicated. **B-C**, OVCAR4 and OVCAR5 lines were grown on adherent and non-adherent conditions for 24h. Cell lysate was prepared, mRNA isolated and qPCR was performed to determine the expression of the genes indicated. Values were presented as mean  $\pm$  SE of triplicates and p-values were determined by the Student's t-test. \* $p < 0.05$ , \*\* $p < 0.01$ , \*\*\* $p < 0.001$  and \*\*\*\* $p < 0.0001$ . **D**, OVCAR5 cells were transfected with lentiviral particles encodes either control shRNAs, or two different shRNAs of EGFR or ERBB2. Stable knockdown of EGFR clone#1 was selected and infected with shERBB2 encoding viral particle to make stable knocked down

of EGFR or ERBB2. Cell lysates were prepared and immunoblotted using the antibodies indicated. **E**, OVCAR5 cells were selected for EGFR, ERBB2 or both EGFR and ERBB2 from (D) were plated on low-attachment plates and the number of spheroids were quantitated after two-weeks **F**, Tumor spheroids from (E) were lysed and immunoblotted using the antibodies indicated. **G**. OVCAR 4 and OVCAR 5 spheroids were grown in the presence of Trastuzumab (5 µg/mL), Erlotinib (4 µM), or Lapatinib (4 µM) for 7 days. 3D-spheroids were photographed, and the number of spheroids were quantitated. **H**, Tumor spheroids from (G) were lysed and immunoblotted using the antibodies indicated. β-actin was used as a loading control.

## Supplementary Figure-4

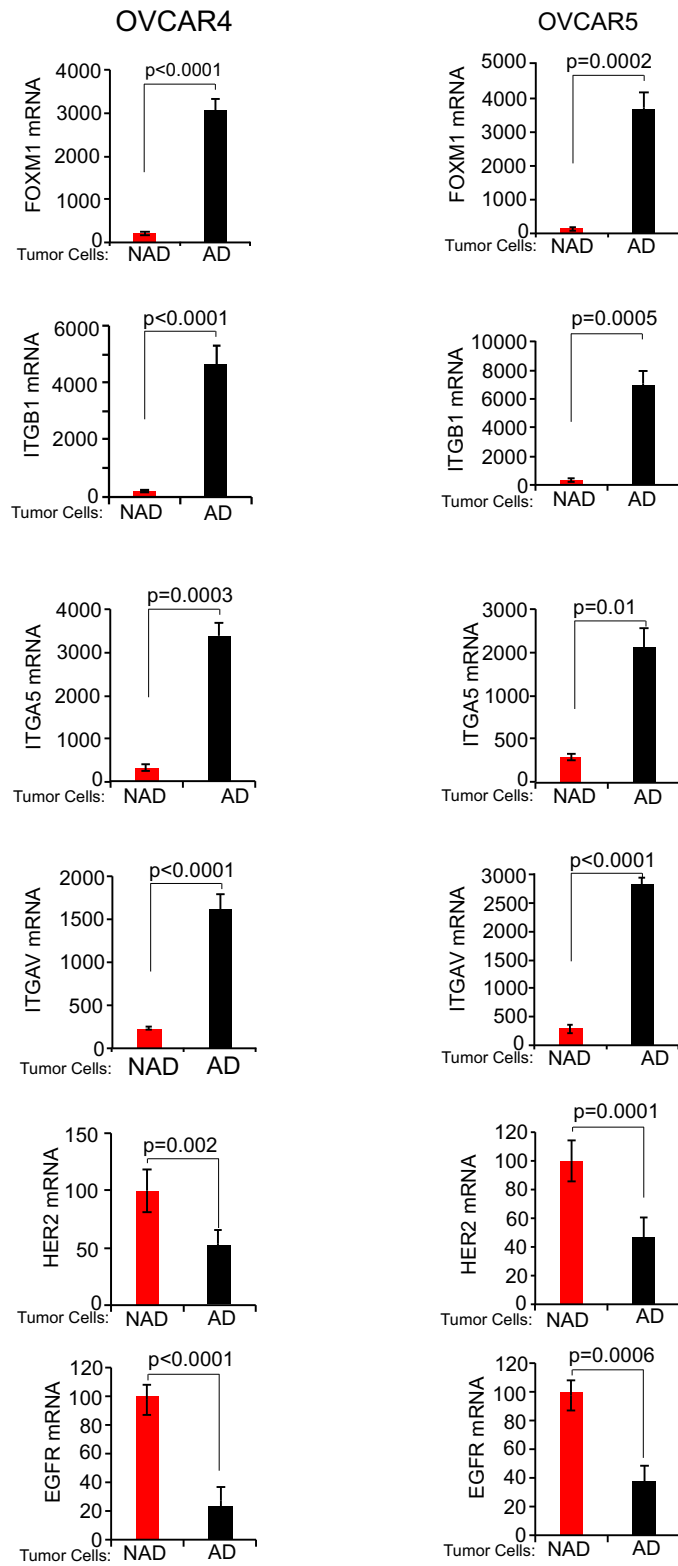



**Supplementary Figure-4:** OVCAR4 or OVCAR5 cells were injected ( $1 \times 10^6$  cells/mice) injected intraperitoneally into the nude mice. Adherent tumor cells were collected from omentum and non-adherent cells in the peritoneum were collected by peritoneal wash using sterile PBS. Tumor cells were lysed, total RNA was isolated, and qPCR was performed.  $\beta$ -actin was used as the internal standard and the values were presented as mean  $\pm$  SE of triplicates and p-values were determined by the Student's t-test.

## Supplementary Figure-5

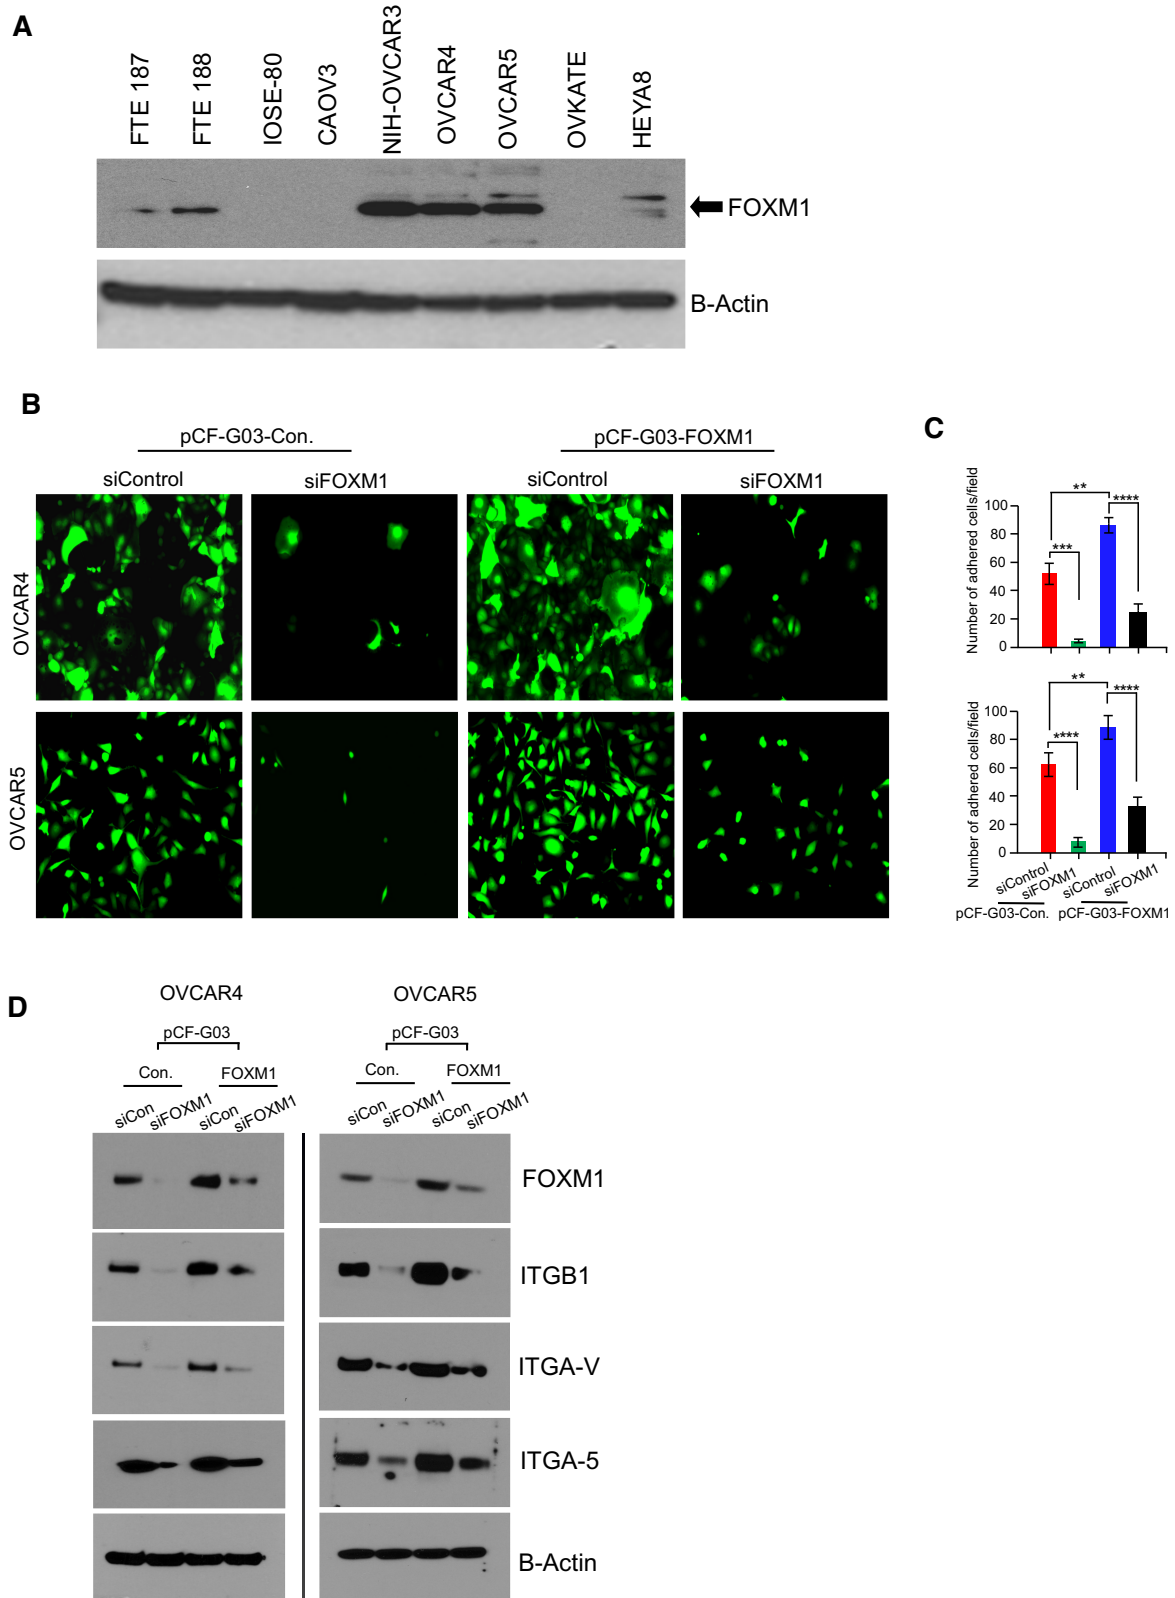

**Supplementary Figure-5: A**, Ovarian cancer cell lines and fallopian tube epithelial cells were lysed and immunoblotted using indicated antibodies. **B-C**. pCF-G03-control vector or pCF-G03-FOXM1 plasmid were transfected in OVCAR4 and OVCAR5 cells stably expressing for 24h, which were pre-transfected with either con siRNAs or FOXM1 siRNAs for 12h. Cells were trypsinized from above and plated on culture plates were coated with extracellular matrix cocktail for 4h for cell adhesion. Non-adherent cells were removed by gentle washing using PBS and number of adherent cells were photographed and quantitated. **D**, Immunoblot was performed using the lysates prepared from (B) with indicated antibodies.

## Supplementary Figure-6

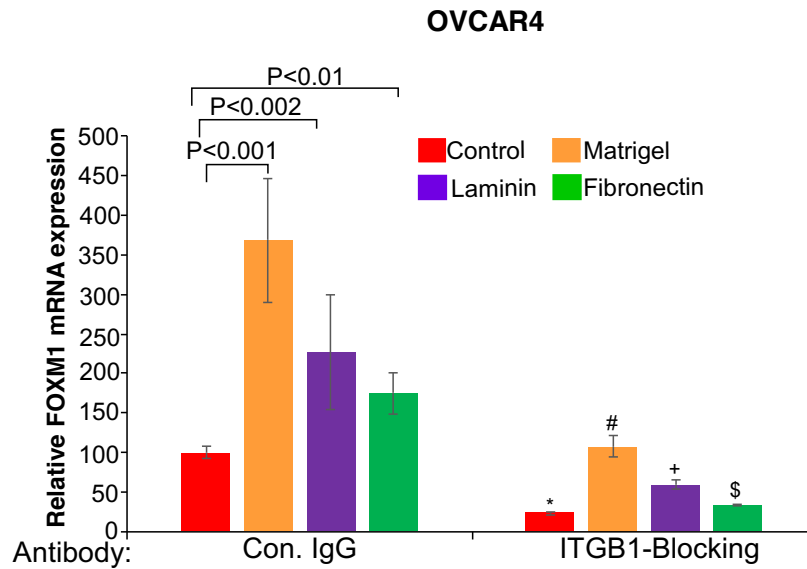

**Supplementary Figure-6:** Ovarian cancer cells were trypsinized and incubated with control IgG or with integrin beta-1 blocking antibody for 1h, then plated on matrigel, Laminin or Fibronectin coated plate. Adherent cells were isolated 3h after adhesion and FOXM1 mRNA expression was determined by qPCR.

## Supplementary Figure-7

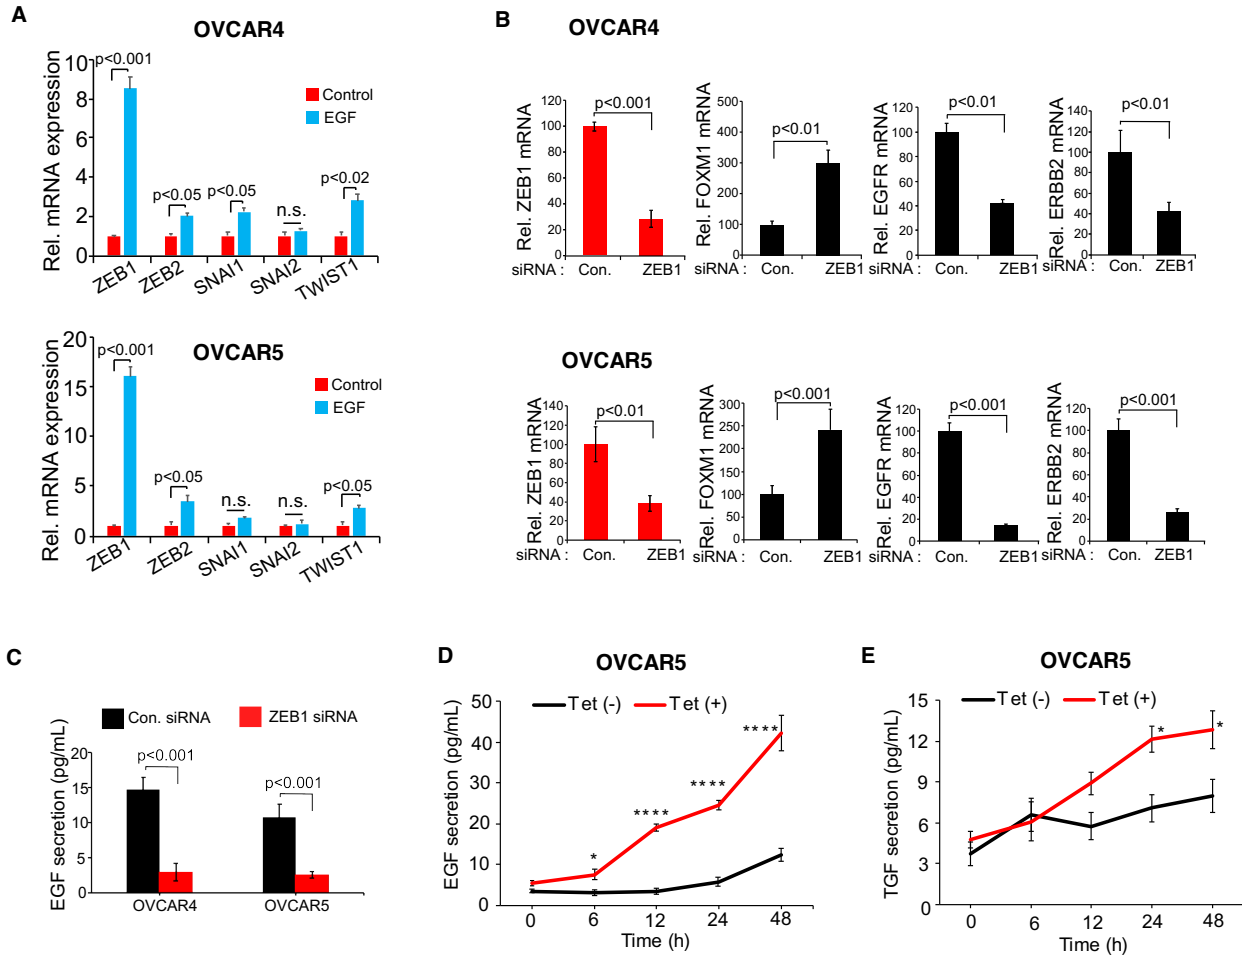

**Supplementary Figure-7: A**, Ovarian cancer cells OVCAR4 were stimulated with EGF and determined the expression of EMT inducing transcription factors by qPCR. **B**, OVCAR4 and OVCAR5 cells were transfected with control or ZEB1 siRNAs, then mRNA was collected 24h after transfection and qPCR was performed to determine the expression of indicated genes. **C**, OVCAR4 and OVCAR5 cells were transfected with control or ZEB1 siRNAs, then culture supernatant was collected after 24h after transfection and ELISA was performed to detect the levels of EGF. **D-E**. Culture supernatant were collected from the OVCAR5 cells stably express inducible ZEB1 after the treatment of tetracycline (1µg/ml) at the indicated time points and performed ELISA

to detect the levels of EGF and TGF- $\alpha$ . Results are from triplicate experiments and error bars represent SE. Significance was calculated by Student's t test by comparing the groups in the same time point. \* $p < 0.01$ , \*\*\*\* $p < 0.0001$

## Supplementary Figure-8

**A**

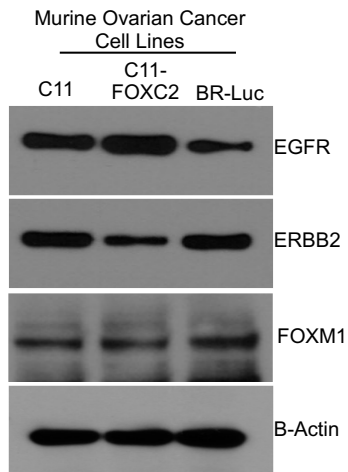

**B**

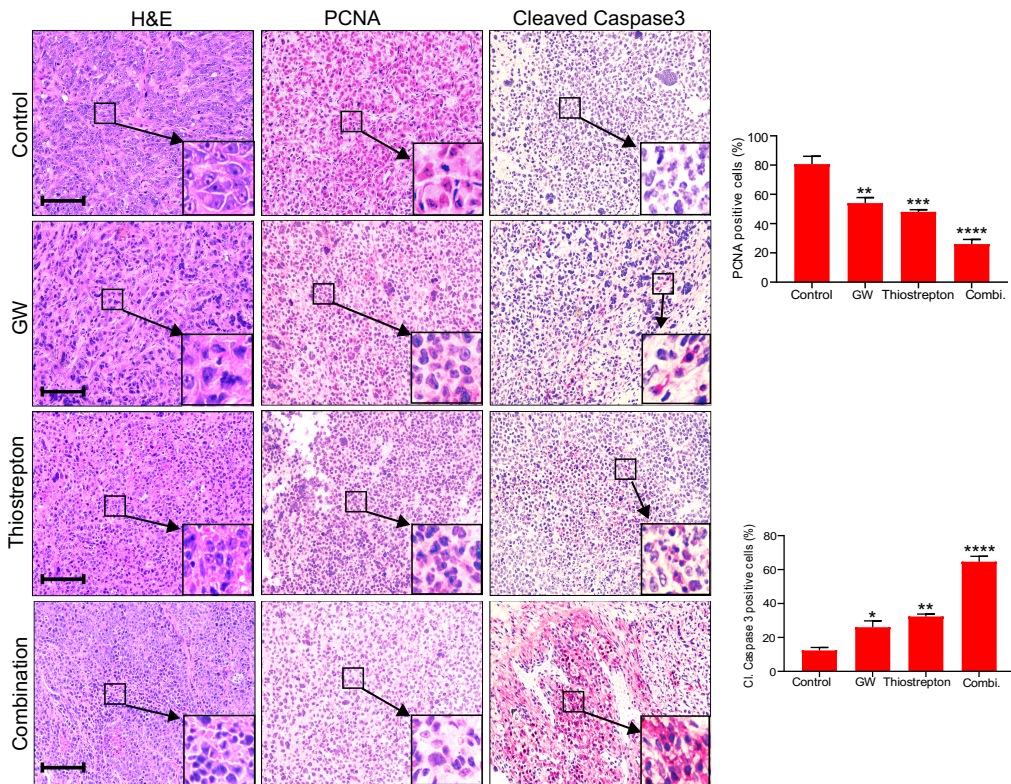

**Supplementary Figure-8. A**, Mouse ovarian cancer cells were lysed and immunoblot was performed using the antibodies indicated. **B**, Representative IHC images of tumor

tissue collected from **Figure-7A**, and stained using Hematoxylin and Eosin, or using the antibodies indicated (left). Images were captured under 20X magnification staining intensity of PCNA and cleaved caspase-3 were quantitated from 5 randomly selected fields (right). Error bars indicate SE of 5 independent determinations. \*\* $p < 0.01$ , \*\*\* $p < 0.001$ , \*\*\*\* $p < 0.0001$ .



# Supplementary Figure-9

A

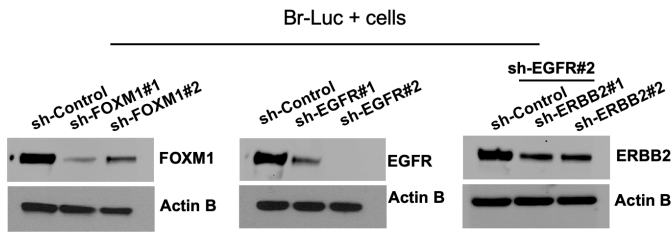

B

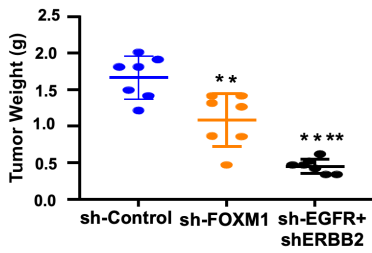

C

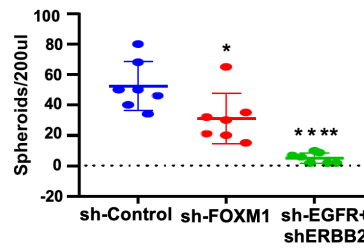

D

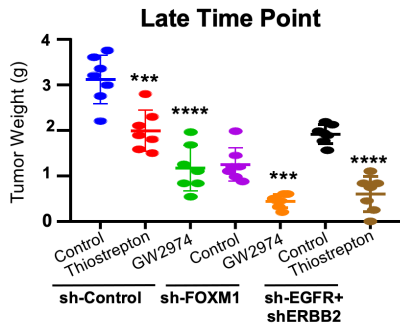

E

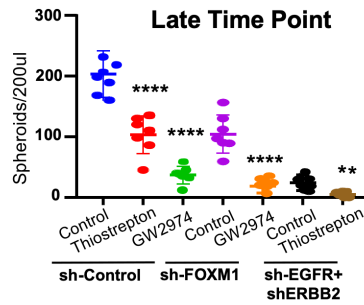

F

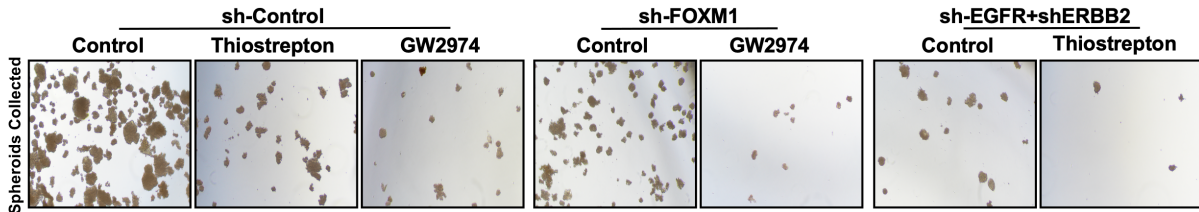

**Supplementary Figure-9. A.** BR-Luc cells, which stably express control shRNA, two different shRNAs target FOXM1 or EGFR. To develop stable knockouts of both EGFR and ERBB2, we used ERBB2- shRNA viral particles to infect BR-Luc cells stably express sh-EGFR (clone #2)). Stable cells were selected and immunoblotted using the indicated antibodies. **B-C.** BR-Luc cells stably knockdown of FOXM1, or knockdown of both EGFR and ERBB2 or BR-Luc cells express control-shRNAs were injected intraperitoneally ( $1 \times 10^5$  cells) in female FVB mice (n=7). Mice were sacrificed on 25<sup>th</sup> day after tumor cell inoculation and tumors from all organ sites and ascites fluid were collected and tumor weight was quantitated. Tumor spheroids in the peritoneum were collected by filtering peritoneal wash through 50  $\mu$ M filter and the number tumor spheroids in the peritoneal fluid were quantitated. **D-E,** Mice bearing BR-Luc cells express control-shRNA cells were treated with either Thiostrepton (FOXM1 inhibitor) or Lapatinib (GW2974). The mice bearing BR-Luc cells expressing sh-FOXM1 were treated with lapatinib; whereas mice bearing BR-Luc cells expressing sh-EGFR and sh-ERBB2, were treated with Thiostrepton. All the drugs were continued twice a week for 7 weeks and monitored tumor growth. Total tumor weight and number tumor spheroids in ascites fluid were determined as described in B and C above. **F,** Tumor spheroids collected from (E) were plated in a 6 well culture plate and the number of spheroids were imaged. Error bars indicates average  $\pm$  SE and p-values were determined by one-way ANOVA.

**Supplementary Table-1: Sequences of siRNAs used for transfections**

| Gene    |           | Sequence                 |
|---------|-----------|--------------------------|
| FoxM1   | Sense     | 5'CACUAUCAACAUAAGCCUA 3' |
|         | Antisense | 5'UAGGCUAUUGUUGAUAGU3'   |
| FoxM1   | Sense     | 5'GCUCAUACCUGGUACCUAU3'  |
|         | Antisense | 5'AUAGGUACCAGGU AUGAGC3' |
| Zeb1    | Sense     | 5'GGAAGAACGUGACAGCACA3'  |
|         | Antisense | 5'UGUGCUGUCACGUUCUCC3'   |
| Zeb1    | Sense     | 5'GGACAGCACAGUAAAUCUA 3' |
|         | Antisense | 5'UAGAUUUACUGUGCUGUCCT3' |
| ERBB2   | Sense     | 5'CAUCAAAGUGUUGAGGGAA3'  |
|         | Antisense | 5'UUCCCUCAACACUUUGAUG3'  |
| EGFR    | Sense     | 5'GCUUUGGUGCCACCUUGCGU3' |
|         | Antisense | 5'ACGCAGGUGGCACCAAAGC3'  |
| TP53    | Sense     | 5'GUCUUUGAACCCUUGCUUG3'  |
|         | Antisense | 5'CAAGCAAGGGUUCAAAGAC3'  |
| EGF     | Sense     | 5'GGAUUAAUCCACGAAUUGA3'  |
|         | Antisense | 5'UCAAUUCGUGGAUUAAUCC3'  |
| TGFA    | Sense     | 5'CAGUUGGUGUCUGAGUCCA3'  |
|         | Antisense | 5'UGGACUCAGACACCAACUG3'  |
| GRB7    | Sense     | 5'GCCUGUACUUCAGCAUGGA3'  |
|         | Antisense | 5'UCCAUGCUGAAGUACAGGC3'  |
| AXL     | Sense     | 5'GGAAGAUUUGGAGAACACA3'  |
|         | Antisense | 5'UGUGUUCUCCAAAUCUCC3'   |
| RPS6KB1 | Sense     | 5'CCACAAUCGUGCUGUGGAU3'  |
|         | Antisense | 5'AUCCACAGCACGAUUGUGG3'  |
| TRIM25  | Sense     | 5'CCAUUUAUCAGAUUCUCCU3'  |
|         | Antisense | 5'AGGAGAAUCUGAUAAAUGG3'  |
| CDK2    | Sense     | 5'GCACGUACGGAGUUGUGUA3'  |
|         | Antisense | 5'UACACAACUCCGUACGUGC3'  |
| MSH6    | Sense     | 5'GAAUUGAUGGAGGCACGAU3'  |
|         | Antisense | 5'AUCGUGCCUCCAUCAUUUC3'  |
| PMS2    | Antisense | 5'GAAGAUACCGGAUGUAAAU3'  |
|         | Sense     | 5'AUUUACAUCCGGUAUCUUC3'  |
| CCND1   | Antisense | 5'GCAUGUUCGUGGCCUCUAA3'  |
|         | Sense     | 5'UUAGAGGCCACGAACAUGC3'  |
| CDH1    | Antisense | 5'GCUGUAUACCAUAUUGA3'    |
|         | Sense     | 5'UCAUAUUGGUGUAUACAGC3'  |
| MCL1    | Antisense | 5'GUAUAGAACUAUGACUGU3'   |
|         | Sense     | 5'ACAGUCAUAGUUCUAUUAC3'  |
| CASP9   | Antisense | 5'CAGACAGUGGUGUUGAUGA3'  |
|         | Antisense | 5'UCAUCAACACCACUGUCUG3'  |
| CDH3    | Sense     | 5'GCAACUUUAUAAUUGAGAA3'  |
|         | Antisense | 5'UUCUCAAUUAUAAAGUUGC3'  |
| FN1     | Sense     | 5'CACUUAUGAGCGUCCUAAA3'  |
|         | Antisense | 5'UUUAGGACGCUCAUAAGUG3'  |
| TP53    | Sense     | 5'GAGGUUGGCUCUGACUGUA3'  |
|         | Antisense | 5'UACAGUCAGAGCCAACCUC3'  |

|       |           |                            |
|-------|-----------|----------------------------|
| ITGA5 | Sense     | 5'CAGAUAAACUUCACCCGAAU3'   |
|       | Antisense | 5'AUUCGGGUGAAGUUAUCUG3'    |
| ITGB1 | Antisense | 5'CUGUUCUUUGGAUACUAGU3'    |
|       | Antisense | 5'ACUAGUAUCCAAAGAACAG3'    |
| ITGAV | Sense     | 5'CUUUACUGCUGAUAGUGCU3'    |
|       | Antisense | 5'AGCACUAUCAGCAGUAAAG3'    |
| SYK   | Sense     | 5'GAUGUACGAUCUCAUGAAU3'    |
|       | Antisense | 5'AUUCAUGAGAUCGUACAUC3'    |
| IL6   | Sense     | 5'CUCACCUCUUCAGAACGAA3'    |
|       | Antisense | 5'UUCGUUCUGAAGAGGUGAG3'    |
| PAX8  | Sense     | 5'CAUUCAACCUCCCUAUGGA3'    |
|       | Antisense | 5'UCCAUAGGGAGGUUGAAUG3'    |
| CASP8 | Sense     | 5'CAUCUCAGUUCACUGGUUU3'    |
|       | Antisense | 5'AAACCAGUGAACUGAGAUG3'    |
| GAB2  | Sense     | 5'CAAAGUGGAUAAUGGACUU3'    |
|       | Antisense | 5'AAGUCCAUAUCCACUUUG3'     |
| LCK   | Sense     | 5' CAUUGAAGAGCGGAUUUAU3'   |
|       | Antisense | 5' AUAAUCCGCUCUCAAUG3'     |
| MUC1  | Sense     | 5' CCACUUCUGCCAACUUGUA3'   |
|       | Antisense | 5' UACAAGUUGGCAGAAGUGG3'   |
| RPS6  | Sense     | 5' GAGCUAGCAGAAUCCGCAA3'   |
|       | Antisense | 5' UUGCGGAUUCUGCUAGCUC3'   |
| ITGA5 | Sense     | 5'CAGAUAAACUUCACCCGAAU3'   |
|       | Antisense | 5'AUUCGGGUGAAGUUAUCUG3'    |
| ITGB1 | Antisense | 5'CUGUUCUUUGGAUACUAGU3'    |
|       | Antisense | 5'ACUAGUAUCCAAAGAACAG3'    |
| ITGAV | Sense     | 5'CUUUACUGCUGAUAGUGCU3'    |
|       | Antisense | 5'AGCACUAUCAGCAGUAAAG3'    |
| PTK2  | Sense     | 5' CUUAGUACAGCUCUUGCAU3'   |
|       | Antisense | 5' AUGCAAGAGCUGUACUAAG3'   |
| STAT3 | Sense     | 5'GAGAUUGACCAGCAGUAUA3'    |
|       | Antisense | 5'CAACAUGUCAUUUGCUGAA3'    |
| KIT   | Sense     | 5' UAAAGGAAACGCUCGACUA3'   |
|       | Antisense | 5' UAGUCGAGCGUUUCCUUUA3'   |
| CHEK1 | Sense     | 5' ACUGCGACUGCUUCUUCAGUU3' |
|       | Antisense | 5' AACUGAAGAAGCAGUCGCAGU3' |
| CHEK2 | Sense     | 5' ACGCCGTCCTTTGAATAACAA3' |
|       | Antisense | 5' AACUGAAGAAGCAGUCGCAGU3' |
| PTEN  | Sense     | 5' GUAUAGAGCGUGCAGUAA 3'   |
|       | Antisense | 5' UUAUCUGCAGCUCUAUAC3'    |
| ABL1  | Sense     | 5'ACGCACGGACATCACCATGAA3'  |
|       | Antisense | 5' AACGGCTGATGTGGACTGTCT3' |

**Supplementary Table-2: Catalogue Numbers of shRNA**

| <b>shRNA</b>      | <b>Catalogue Numbers</b>         | <b>Species</b> | <b>Company Name</b> |
|-------------------|----------------------------------|----------------|---------------------|
| <b>Sh-ERBB2-</b>  | TRCN0000039882<br>TRCN0000039881 | Human          | Sigma Aldrich       |
| <b>Sh-EGFR-</b>   | TRCN0000121068<br>TRCN0000295971 | Human          | Sigma Aldrich       |
| <b>Sh-FOXM1</b>   | TRCN0000015546<br>TRCN0000015544 | Human          | Sigma Aldrich       |
| <b>Sh-FOXM1</b>   | TRCN0000349136<br>TRCN0000304362 | Mouse          | Sigma Aldrich       |
| <b>Sh-Control</b> | CSHCTR001-<br>LVRU6MH            | Mouse          | GeneCopoeia         |
| <b>Sh-Control</b> | CSHCTR001-<br>LVRH1GP            | Mouse          | GeneCopoeia         |
| <b>Sh-ERBB-2</b>  | CS-MSH023592-<br>LVRU6MH-01      | Mouse          | GeneCopoeia         |
| <b>Sh-EGFR-1</b>  | CS-MSH043628-<br>LVRH1GP-01      | Mouse          | GeneCopoeia         |

**Supplementary Table-3. Sequences of the primers used for qPCR reactions**

| Gene       | Sequence                         |
|------------|----------------------------------|
| FOXM1      | F: 5' TGCAGCTAGGGATGTGAATCTTC 3' |
|            | R: 5' GGAGCCCAGTCCATCAGAACT 3'   |
| ZEB1       | F: 5' GATGCGAAAACGCGAGGTTTT 3'   |
|            | R: 5' GCTTCTAGACAGGAAATCCCACA 3' |
| ITGB1      | F: 5' CCGCGCGGAAAAGATGAA 3'      |
|            | R: 5' TTGAATTTGTGCACCACCCAC 3'   |
| ITGAV      | F: 5' AGGGAAGCAAAGGACCGTCT 3'    |
|            | R: 5' AAGAGGGCTGAGCTTCGGA 3'     |
| ITGA5      | F: 5' CAGCCTTGCCAGAGATCCAA 3'    |
|            | R: 5' TCCTTGTGTGGCATCTGTCC 3'    |
| LAMB1      | F: 5' TCGGCTTTCAAACAAAAGAGGC 3'  |
|            | R: 5' TAGCCTTGGGAGGAACAGAG 3'    |
| FN1        | F: 5' ACAAGCATGTCTCTCTGCCA 3'    |
|            | R: 5' TCAGGAAACTCCCAGGGTGA 3'    |
| CD44       | F: 5' CCTGGCAGCCCCGATTATTT 3'    |
|            | R: 5' AAGGACACACCCAAGCAAGG 3'    |
| CD24       | F: 5' GAGAGATAACCCTGCCCGAG 3'    |
|            | R: 5' CAAAAGAAAAGTCCGCGCCT 3'    |
| C-KIT      | F: 5' ACTGTGGCCGTTATCTGGAAG 3'   |
|            | R: 5' CTTGGGTGACAACACAACCC 3'    |
| ENDOGLIN   | F: 5' TACCACAGCCTTCATCTGCG 3'    |
|            | R: 5' AGTTGCTGTCCGAAGGATGG 3'    |
| EGFR       | F: 5' GGCAGGAGTCATGGGAGAA 3'     |
|            | R: 5' GCGATGGACGGGATCTTAG 3'     |
| HER2       | F: 5' TTGGACAGCACCTTCTACCG 3'    |
|            | R: 5' GCTGGTTCACATATTCCTGGT 3'   |
| PROMININ   | F: 5' CCATACCTAGGTCCCCGTCC 3'    |
|            | R: 5' TTTATGACCCGGCTTCTGGG 3'    |
| E CADHERIN | F: 5' GCTGGACCGAGAGAGTTTCC 3'    |
|            | R: 5' CAAAATCCAAGCCCGTGGTG 3'    |
| VIMENTIN   | F: 5' GCAGGAGGCAGAAGAATGGT 3'    |
|            | R: 5' CCACTTCACAGGTGAGGGAC 3'    |
| ACTB       | F: 5' GTCATTCCAAATATGAGATGCGT 3' |
|            | R: 5' GCTATCACCTCCCCTGTGTG 3'    |

**Supplementary Table-4. Sequences of primers used for the qPCR after chromatin immunoprecipitation**

| Gene    | Sequence                          |
|---------|-----------------------------------|
| ITGB1   | F: 5' GTTCCAGCCCCAATCTCCA 3'      |
|         | R: 5' GTCACGAAGGGTGGTGAGAC 3'     |
| ITGAV   | F: 5' GCCCTCTCTCTCAGTCCAGT 3'     |
|         | R: 5' AAGAAAGGATTCGCAGGGCA 3'     |
| ITGA5   | F: 5' GGAGCTGAAGGTTGGGTCC 3'      |
|         | R: 5' CAGTTGACCAAAAGCCTGCG 3'     |
| LAMB1   | F: 5' TGGATACTAGGGGCGGAGAG 3'     |
|         | R: 5' GGACTCGCGCATTACGTTT 3'      |
| FN1     | F: 5' GCCCTGGGACTGAAAAGTCT 3'     |
|         | R: 5' GGTGGTGGTAGTGTGTTGAGG 3'    |
| ZEB1    | F: 5' TTCCAATACTCCGGTCACGTTT 3'   |
|         | R: 5' GCTTCCCACCTCCTTCAATA 3'     |
| AURKB   | F: 5' GGGTCCAAGGCACTGCTAC 3'      |
|         | R: 5' GGGGCGGGAGATTTGAAAAG 3'     |
| B-ACTIN | F: 5' AGCGCGGCTACAGCTTCA 3'       |
|         | R: 5' CGTAGCACAGCTTCTCCTTAATGT 3' |

**Supplementary Table-5. Catalogue numbers and available Research Resource Identifier (RRID) number of reagents and software**

**KEY RESOURCES TABLE**

| REAGENT or RESOURCE                                 | SOURCE                    | IDENTIFIER                         |
|-----------------------------------------------------|---------------------------|------------------------------------|
| <b>Antibodies</b>                                   |                           |                                    |
| anti- $\beta$ -Actin                                | Santa Cruz Biotechnology  | Cat# sc-58679; RRID: AB_772478     |
| Purified Mouse IgG1, $\kappa$ Isotype Ctrl Antibody | Biolegend                 | Cat# 401401, RRID: AB_2801452      |
| Cleaved caspase3                                    | Cell Signaling Technology | Cat# 9661, RRID: AB_2341188        |
| Anti-rabbit IgG, HRP-linked Antibody                | Cell Signaling Technology | Cat# 7074, RRID: AB_2099233        |
| Anti-mouse IgG, HRP-linked Antibody                 | Cell Signaling Technology | Cat# 7076, RRID: AB_330924         |
| Human ErbB2/Her2                                    | R&D System                | Cat# FAB9589G, RRID: AB_2800468    |
| FOXM1                                               | Santa Cruz Biotechnology  | Cat# sc-376471, RRID: AB_11150135  |
| EGFR                                                | Cell Signaling Technology | Cat# 4267S RRID: RRID: AB_2246311  |
| pEGFR Y1068                                         | Cell Signaling Technology | Cat# 3777S RRID: RRID: AB_2096270  |
| pEGFR Y992                                          | Cell Signaling Technology | Cat# 2235S RRID: RRID: AB_331708   |
| HER2                                                | Cell Signaling Technology | Cat# 2165S RRID: RRID: AB_10692490 |
| pHER2 Y877                                          | Cell Signaling Technology | Cat# 2241S RRID: AB_2099407        |
| pHER2 Y1248                                         | Cell Signaling Technology | Cat# 2247S RRID: AB_331725         |
| CD44                                                | Abcam                     | Cat# ab157107 RRID: AB_2847859     |
| CD24                                                | Abcam                     | Cat# ab179821 RRID: Not Available  |
| c-Kit                                               | Abcam                     | Cat# ab32363 RRID: RRID: AB_731513 |
| ITGAB1                                              | Cell Signaling Technology | Cat# 4707P RRID: RRID: AB_2129049  |
| ITGA-V                                              | Cell Signaling Technology | Cat# 4711T RRID: RRID: AB_2128178  |
| ITGA-5                                              | Cell Signaling Technology | Cat# 4705T RRID: RRID: AB_2233962  |
| ZEB1                                                | Cell Signaling Technology | Cat# 3396S RRID: RRID: AB_1904164  |



|                                               |                                       |                                   |
|-----------------------------------------------|---------------------------------------|-----------------------------------|
| GFP                                           | Cell Signaling Technology             | Cat# 2956S RRID: RRID: AB_1196615 |
| EpCAM-PE                                      | Invitrogen (Thermo Fisher Scientific) | Cat# 12-5791-83; RRID: AB_953617  |
| CD45-FITC                                     | Invitrogen (Thermo Fisher Scientific) | Cat#110459-42; RRID: AB_10852703  |
| Chemicals, Peptides, and Recombinant Proteins |                                       |                                   |
| DMEM                                          | Thermo Fisher Scientific              | Cat# 10569010                     |
| FBS                                           | Atlanta Biologicals                   | Cat# H17112                       |
| Antibiotic (Penicillin/Streptomycin)          | Thermo Fisher Scientific              | Cat# 15140122                     |
| DMSO                                          | Sigma Aldrich                         | Cat# D8418                        |
| Lipofectamine 2000                            | Invitrogen-Thermo Fisher Scientific   | Cat# 11668027                     |
| Dharmafect Transfection Reagent               | Dharmacon                             | Cat# T-2001-01                    |
| RNAiMax Transfection Reagent                  | Thermo Fisher Scientific              | Cat# 13778030                     |
| Insulin                                       | Sigma Aldrich                         | Cat# I3536                        |
| Trypan Blue                                   | Sigma Aldrich                         | Cat# T8154                        |
| MTT                                           | Sigma Aldrich                         | Cat# M5655                        |
| Glutaraldehyde                                | Sigma Aldrich                         | Cat# G7651                        |
| Crystal Violet                                | Sigma Aldrich                         | Cat# C6158                        |
| Acetic acid                                   | Sigma Aldrich                         | Cat# A6283                        |
| Trypsin                                       | Thermo Fisher Scientific              | Cat# 15400054                     |
| PBS                                           | Sigma Aldrich                         | Cat# P5493                        |
| RIPA buffer                                   | Thermo Fisher Scientific              | Cat# 89900                        |
| Protein A/G Magnetic Beads                    | Thermo Fisher Scientific              | Cat# 88802                        |
| Paraformaldehyde                              | Sigma Aldrich                         | Cat# 158127                       |
| Triton X 100                                  | Sigma Aldrich                         | Cat# T8787                        |
| Glycine                                       | Sigma Aldrich                         | Cat# G8898                        |
| PIPES                                         | Sigma Aldrich                         | Cat# P6757                        |
| KCl                                           | Sigma Aldrich                         | Cat# P9333                        |
| NP40                                          | Thermo Scientific                     | Cat# 85124                        |
| Sodium butyrate                               | Sigma Aldrich                         | Cat# B5887                        |
| Protease inhibitor cocktail                   | Sigma Aldrich                         | Cat# P8340                        |
| Dynabeads™ Protein A                          | Invitrogen                            | Cat# 10001D                       |
| Proteinase K                                  | Invitrogen                            | Cat# 25530049                     |
| RNAse A                                       | Invitrogen                            | Cat# AM2271                       |
| HBSS                                          | Thermo Fisher Scientific              | Cat# 14060040                     |
| 10% Formalin fixative                         | VWR                                   | Cat# 16004-121                    |
| TURBO DNase                                   | Invitrogen                            | Cat# AM2238                       |
| Tween 20                                      | Bio-Rad                               | Cat# 1706531                      |
| BSA                                           | Sigma Aldrich                         | Cat# A7906                        |
| Ampicillin                                    | Sigma Aldrich                         | Cat# A5354                        |
| LB Agar                                       | Sigma Aldrich                         | Cat# L2897                        |
| LB Broth (Lennox)                             | Sigma Aldrich                         | Cat# L3022                        |
| Hematoxylin Solution, Harris Modified         | Sigma Aldrich                         | Cat# HHS32-1L                     |
| IHC Antigen Retrieval solution                | IHC World                             | Cat# IW-1100                      |

|                                                             |                                                       |                                   |
|-------------------------------------------------------------|-------------------------------------------------------|-----------------------------------|
| Anti-Puromycin                                              | Sigma Aldrich                                         | Cat# MABE343; RRID:<br>AB_2566826 |
| Erlotinib                                                   | Selleckchem                                           | Cat# S1023                        |
| GW2974                                                      | Selleckchem                                           | Cat# S2111                        |
| Thiostrepton                                                | Selleckchem                                           | Cat# S4354                        |
| D-luciferin                                                 | Goldbio                                               | Cat# LUCK-1G                      |
| EGF                                                         | Invitrogen                                            | Cat# PHG0314                      |
| Polybrene Transfection Reagent                              | Millipore                                             | Cat# TR-1003                      |
| <b>Critical Commercial Assay Kits</b>                       |                                                       |                                   |
| Calcein AM/EtBr based<br>Live/Dead cell viability Kit       | Molecular Probes,<br>Thermo Fisher Scientific<br>Inc. | Cat# L3224                        |
| Pierce BCA Protein Assay kit                                | Thermo Fisher Scientific                              | Cat# 23227                        |
| Subcellular Protein Fractionation<br>Kit for Cultured Cells | Thermo Fisher Scientific                              | Cat# 78840                        |
| RNeasy kit                                                  | Qiagen                                                | Cat# 74104                        |
| iScript cDNA synthesis kit                                  | Bio-Rad                                               | Cat# 1708891                      |
| iTaq Universal SYBR Green PCR<br>Kit                        | Bio-Rad                                               | Cat# 1725121                      |
| Dual-Luciferase Reporter Assay<br>kit                       | Promega                                               | Cat# E1910                        |
| ChIP assay kit                                              | Millipore Sigma                                       | Cat# 17-295                       |
| QIAquick PCR purification kit                               | Qiagen                                                | Cat# 28104                        |
| Mycoplasma negative by PC R                                 | Agilent Mycosensor<br>Mycoplasma assay kit            | Cat# 302109                       |
| FITC Annexin V/Dead Cell<br>Apoptosis Kit                   | BD<br>Pharmingen                                      | Cat# 556547                       |
| Custom RT <sup>2</sup> PCR Array                            | Qiagen                                                | Cat# 330171 CLAH36595             |
| Human EGF Quantikine ELISA<br>Kit                           | R&D                                                   | Cat# DEG00                        |
| Human TGF-alpha Quantikine<br>ELISA Kit                     | R&D                                                   | Cat# DTGA00                       |
| Human Amphiregulin Quantikine<br>ELISA Kit                  | R&D                                                   | Cat# DAR00                        |
| <b>Experimental Models: Cell Lines</b>                      |                                                       |                                   |
| IOSE80                                                      | MD Anderson Cancer<br>Center                          | N/A                               |
| FTE187                                                      | MD Anderson Cancer<br>Center                          | N/A                               |
| FTE188                                                      | MD Anderson Cancer<br>Center                          | N/A                               |
| OVCAR4                                                      | NCI                                                   | Cat# OVCAR-4, RRID:<br>CVCL_1627  |
| OVCAR5                                                      | NCI                                                   | Cat# OVCAR-5, RRID:<br>CVCL_1628  |
| HEYA8                                                       | MD Anderson Cancer<br>Center, Texas, USA              | N/A                               |

|                                               |                                                 |                                                                                                                       |
|-----------------------------------------------|-------------------------------------------------|-----------------------------------------------------------------------------------------------------------------------|
| IGROV1                                        | MD Anderson Cancer Center, Texas, USA           | N/A                                                                                                                   |
| C11,                                          | University of California, Los Angeles, CA, USA. | N/A                                                                                                                   |
| C11-FOXC2                                     | University of California, Los Angeles, CA, USA. | N/A                                                                                                                   |
| BR-Luc                                        | University of California, Los Angeles, CA, USA. | N/A                                                                                                                   |
| MeT-5A                                        | ATCC                                            | Cat# CRL-9444; RRID: CRL-9444                                                                                         |
| <b>Biological Samples</b>                     |                                                 |                                                                                                                       |
| Human ovarian cancer tissues                  | Medical College of Wisconsin                    | Protocol Number: PRO00033433                                                                                          |
| <b>Experimental Models: Organisms/Strains</b> |                                                 |                                                                                                                       |
| FVB/NJ - Homozygous mice                      | Jackson Laboratories                            | Cat# 001800                                                                                                           |
| <b>Oligonucleotides</b>                       |                                                 |                                                                                                                       |
| Primers for qPCR, see Table S4                | IDT                                             | N/A                                                                                                                   |
| Primers for CHIP-qPCR, see Table S4           | IDT                                             | N/A                                                                                                                   |
| <b>Software and Algorithms</b>                |                                                 |                                                                                                                       |
| GraphPad Prism 7                              | GraphPad Software                               | <a href="https://www.graphpad.com/scientific-software/prism/">https://www.graphpad.com/scientific-software/prism/</a> |
| FlowJo Software                               | FlowJo                                          | <a href="https://www.flowjo.com/">https://www.flowjo.com/</a>                                                         |
| qPCR software                                 | BioRad CFX Maestro                              | Cat# 12004110                                                                                                         |
| DNASTar                                       | DNASTAR, Inc.                                   | <a href="https://www.dnastar.com/software/lasergene/">https://www.dnastar.com/software/lasergene/</a>                 |
| Image J: J Coloc 2 image analysis plug-in     | Image J                                         | <a href="https://imagej.net/Coloc_2">https://imagej.net/Coloc_2</a>                                                   |

### **Legends to Supplemental Spread Sheet 1.**

List of Differentially expressed total and phosphorylated proteins present in OVCAR4 adherent cells versus non-adherent cells.

### **Legends to Supplemental Spread Sheet 2.**

List of Differentially expressed total and phosphorylated proteins present in OVCAR5 adherent cells versus non-adherent cells.
